# Supplementary material
Source: PubMed Central journal article supplement (PMC6361680)
Supplement: NIHMS993080-supplement-Supp_figS1-21.pdf [file NIHMS993080-supplement-Supp_figS1-21.pdf]

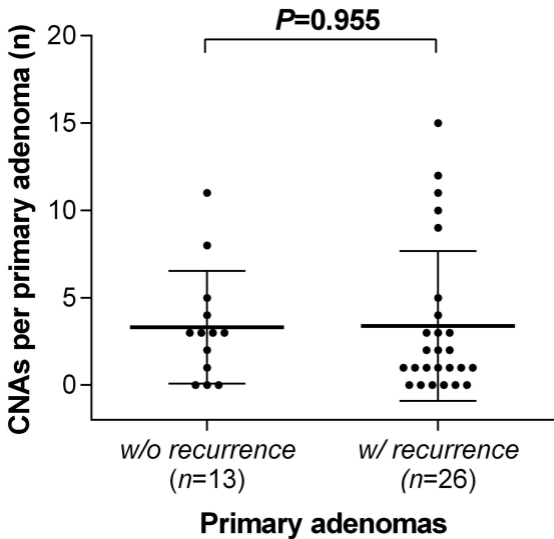

Supporting Information Figure 1



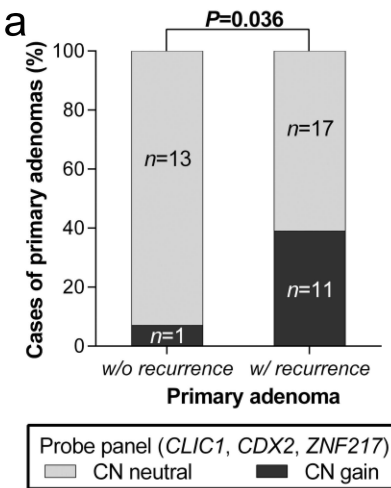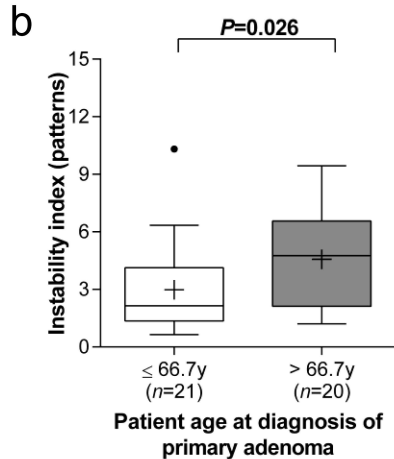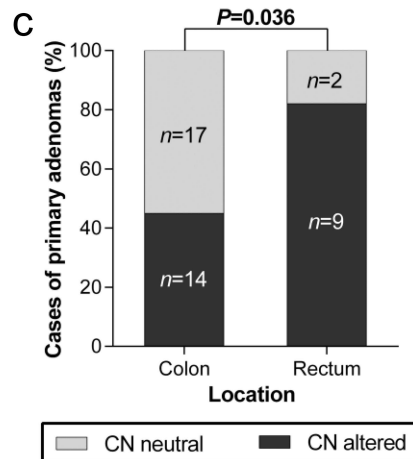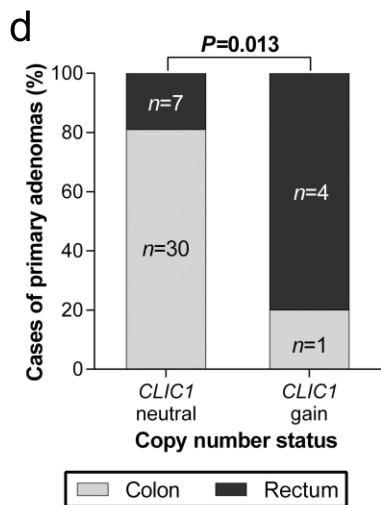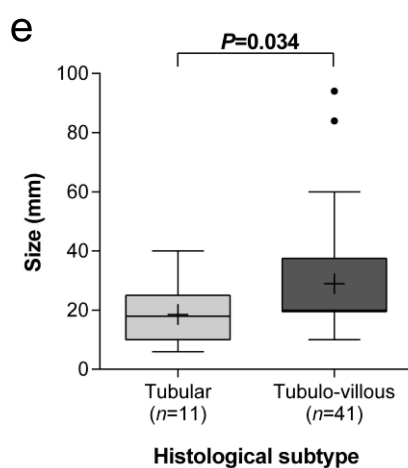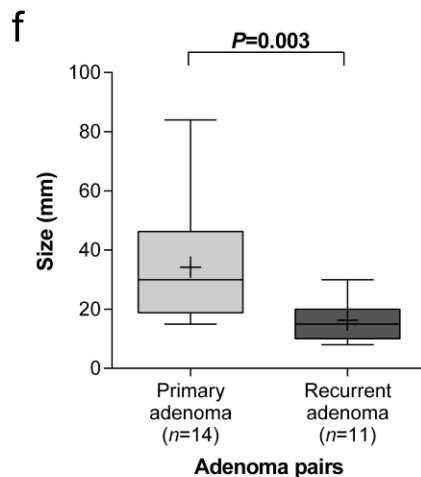

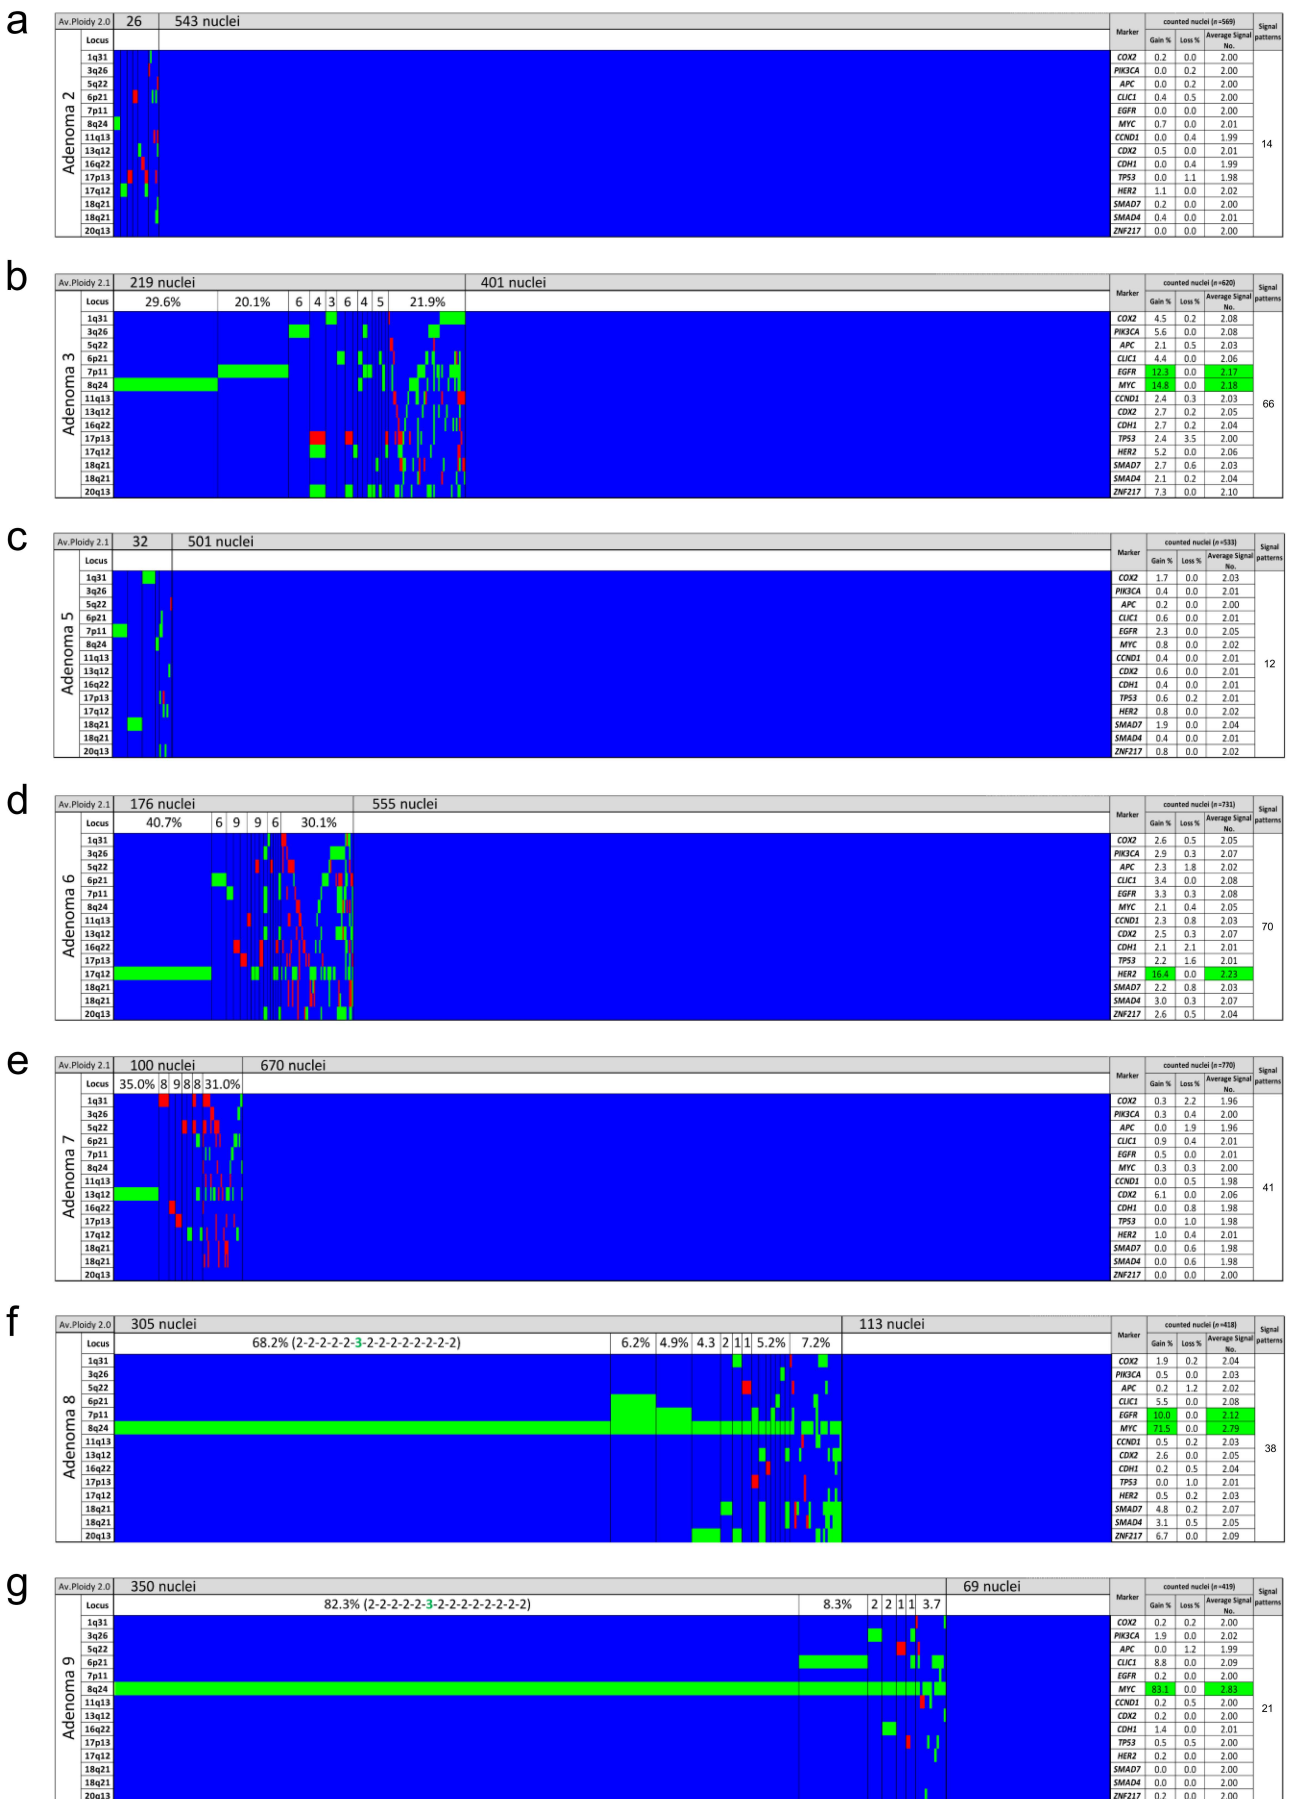

Supporting Information Figure 4

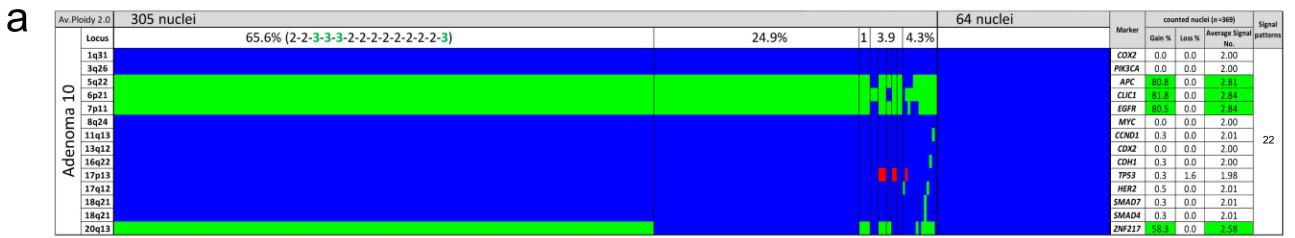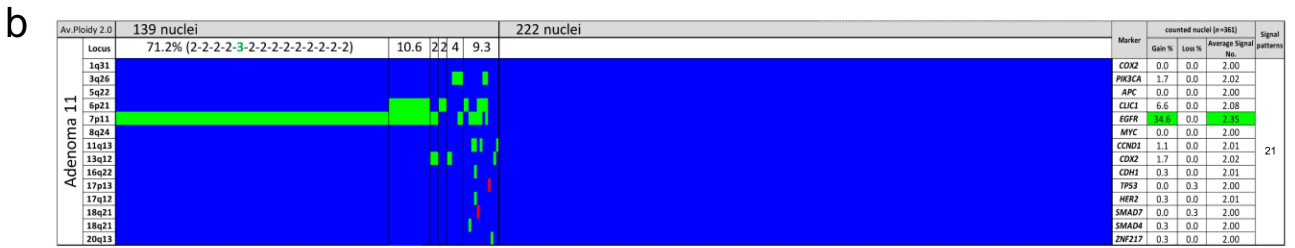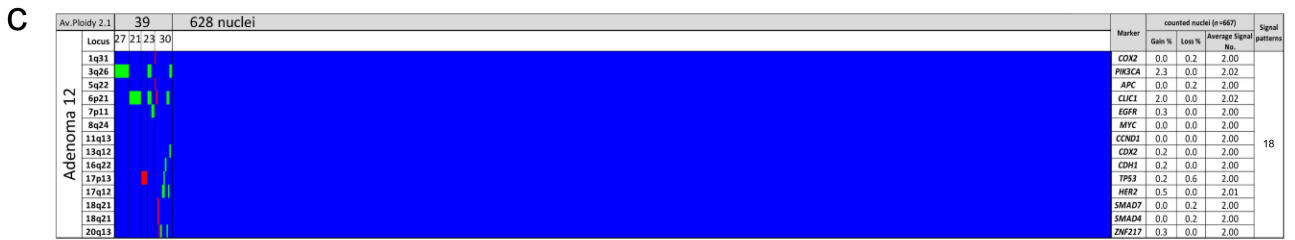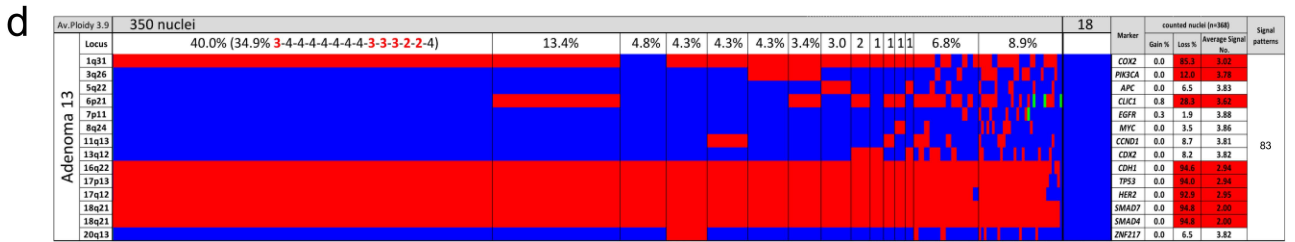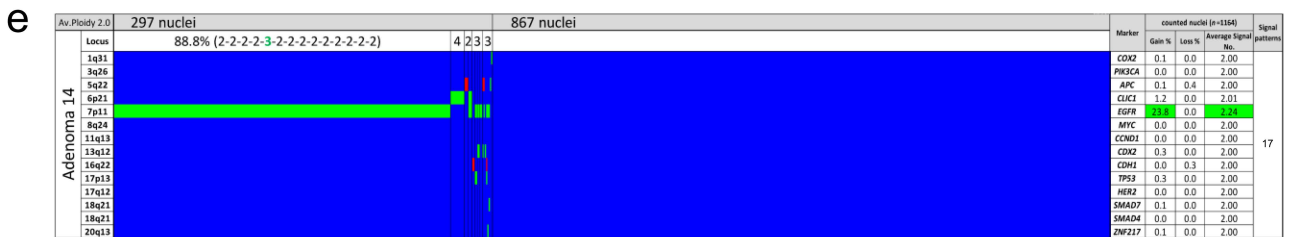

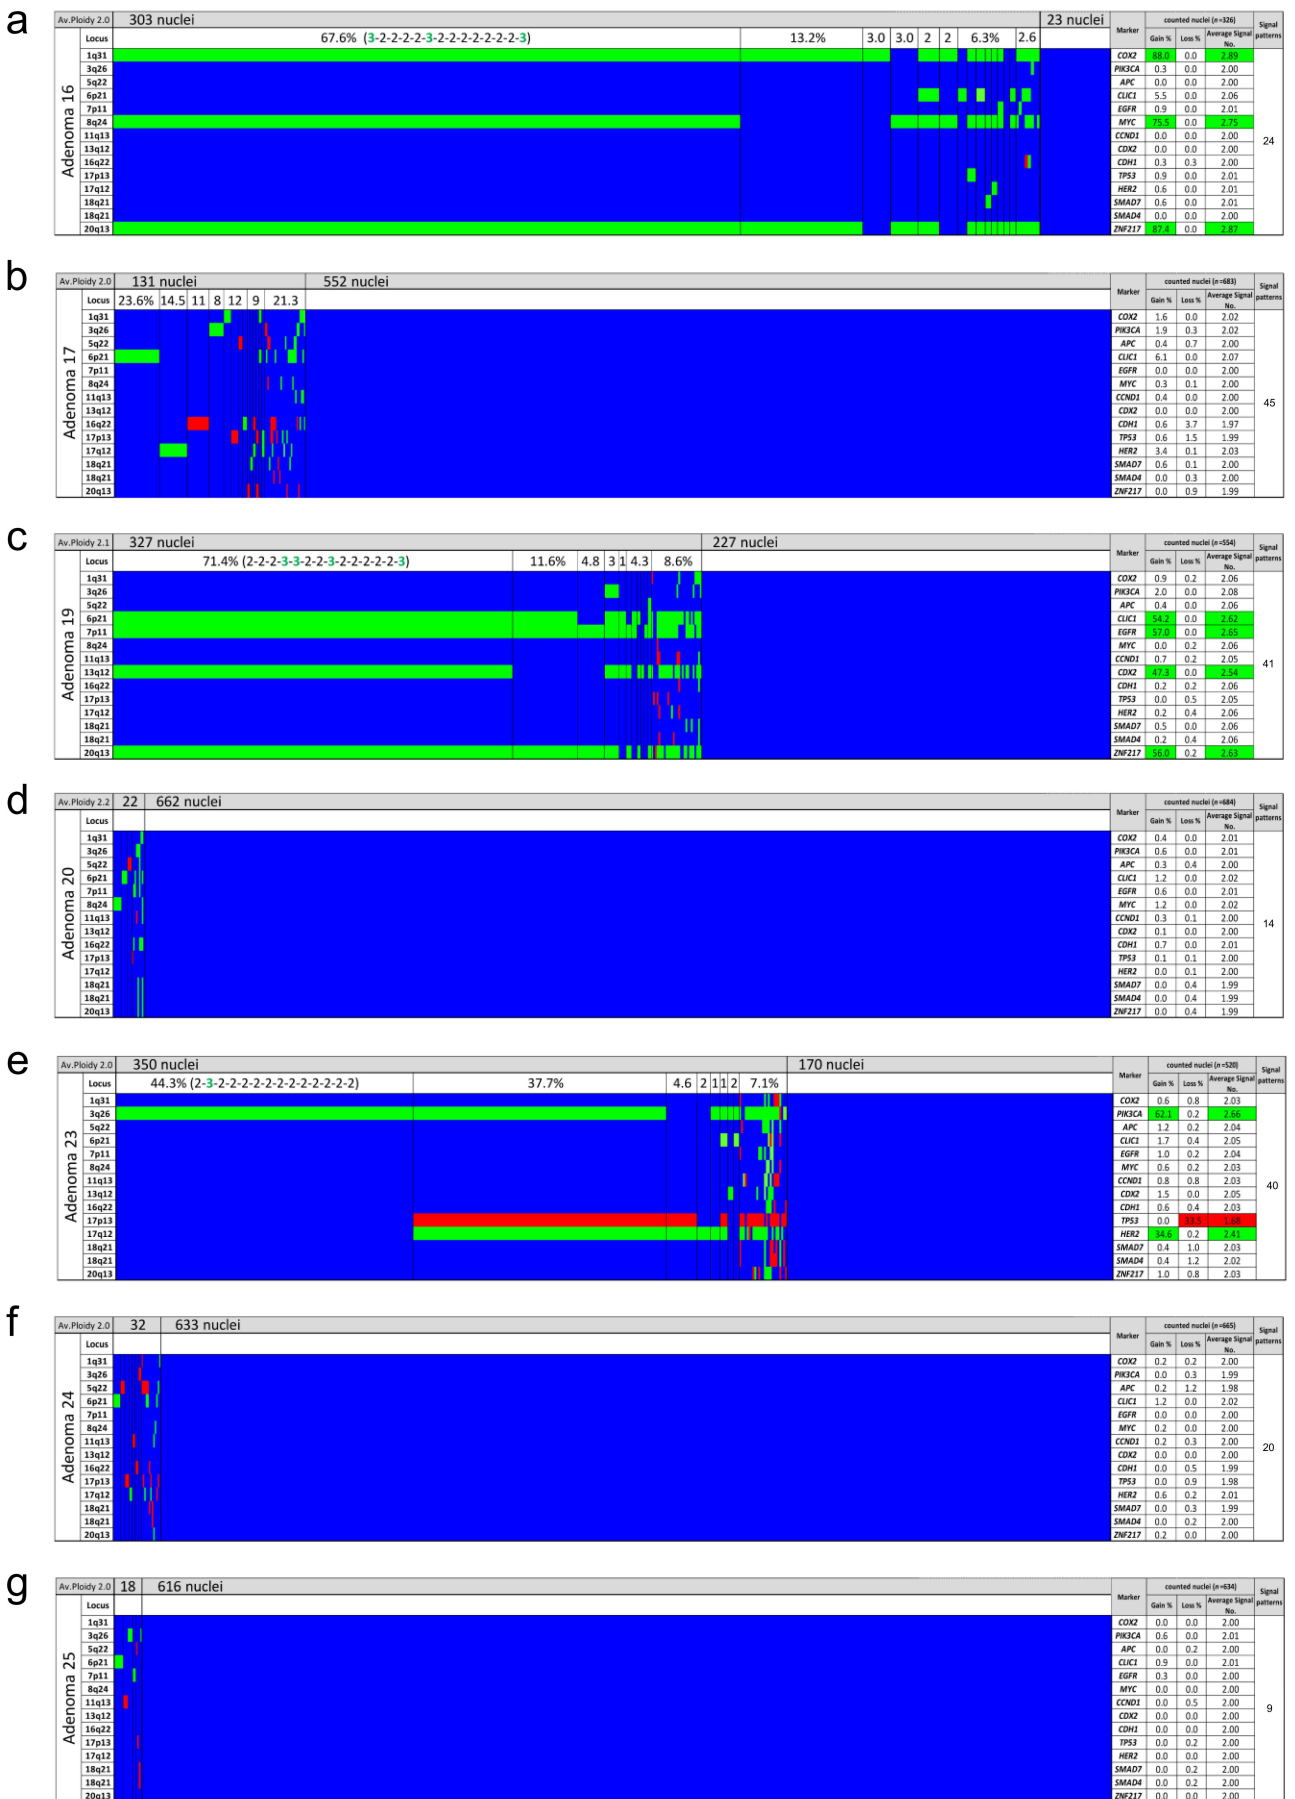

Supporting Information Figure 6

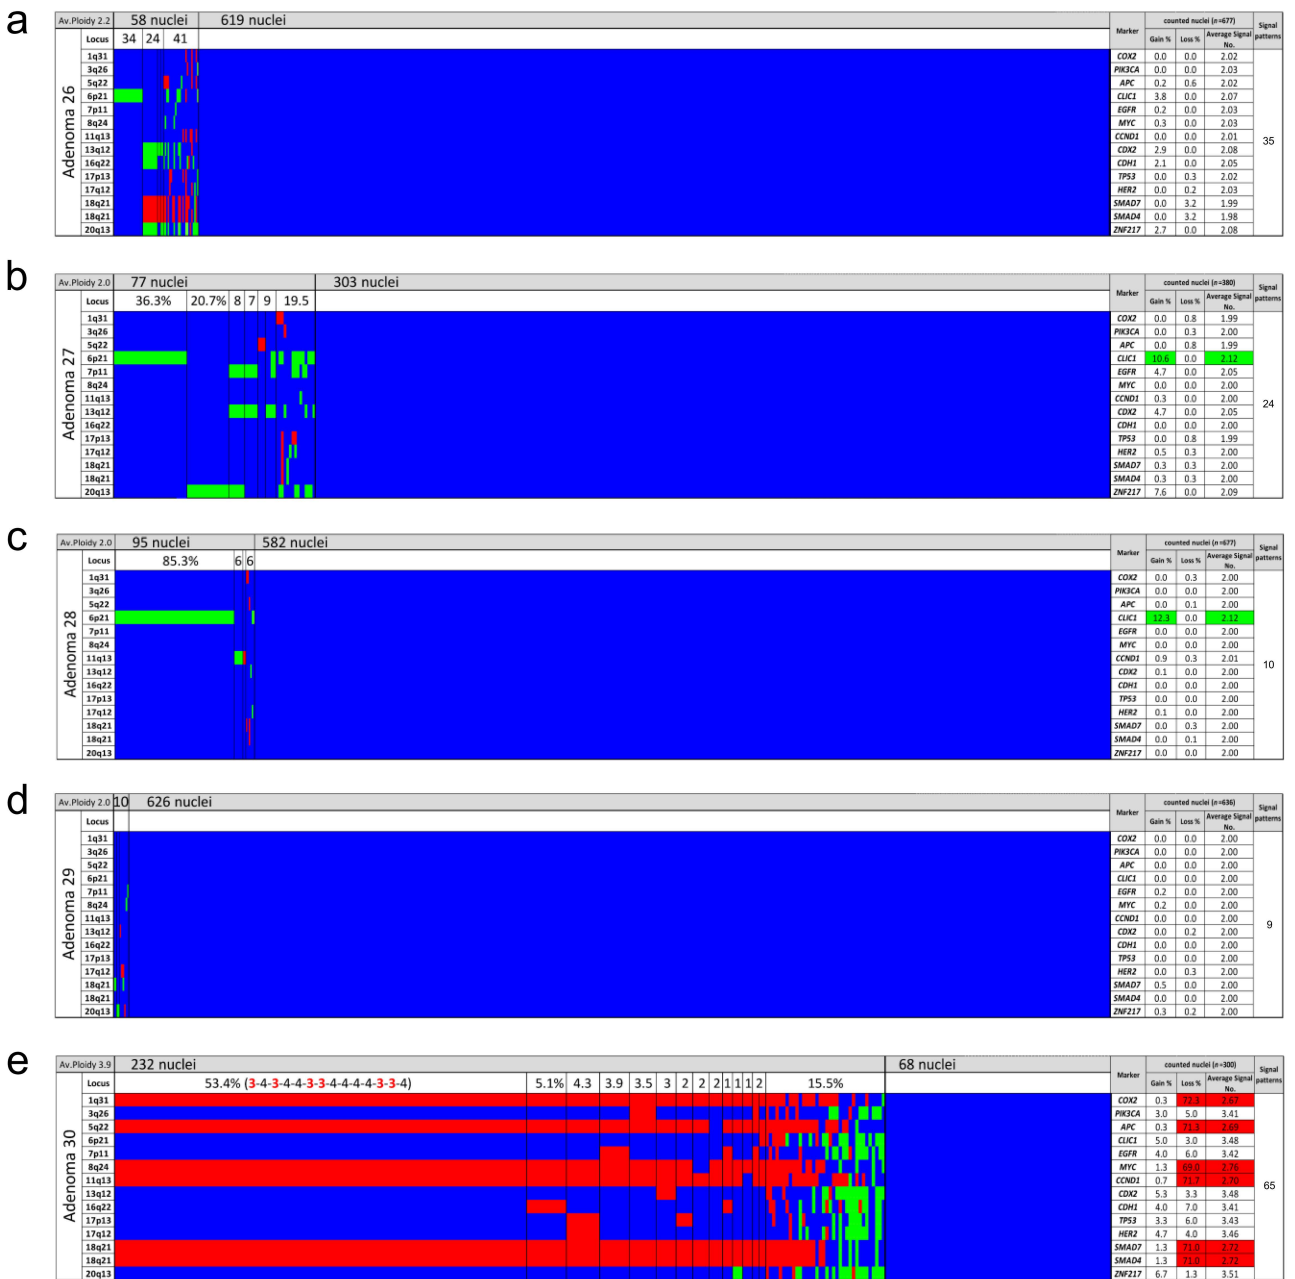

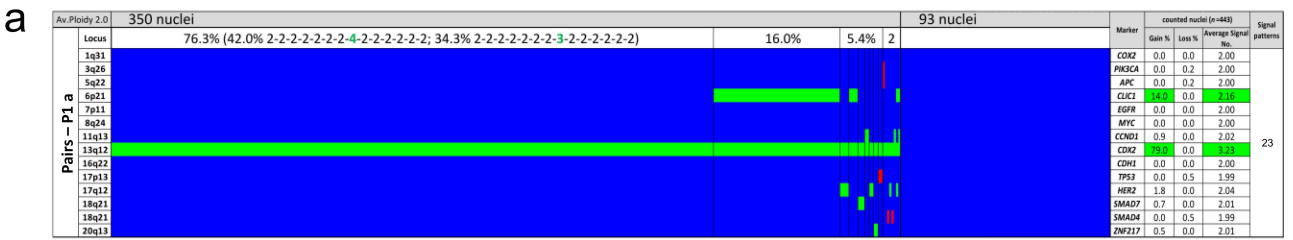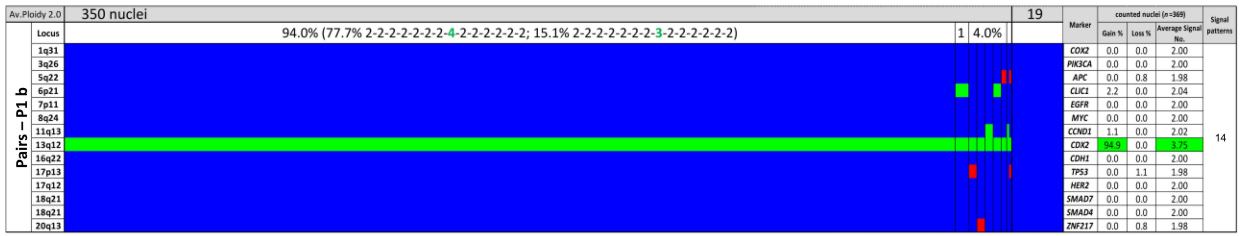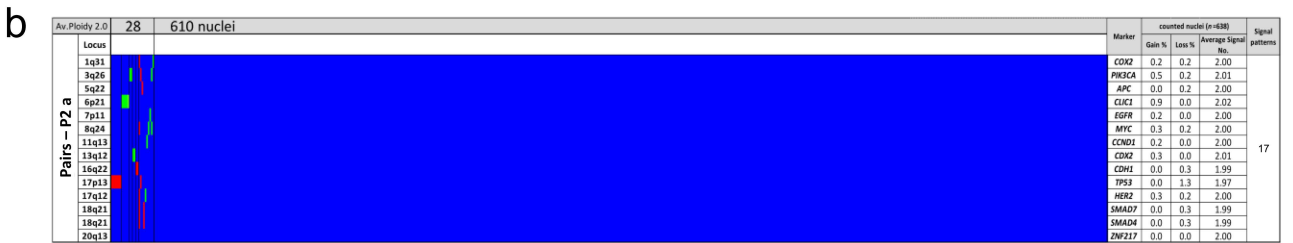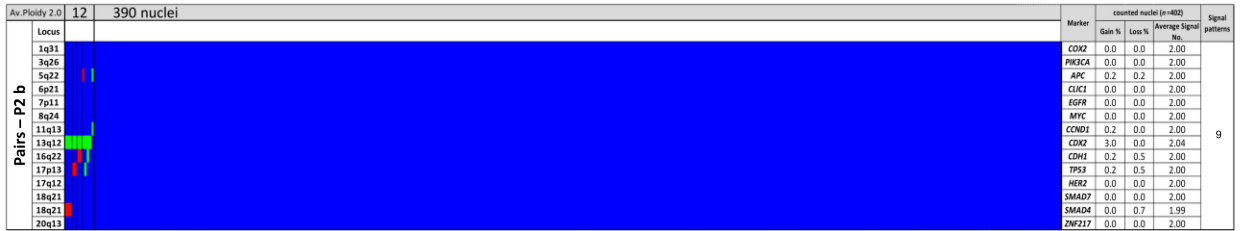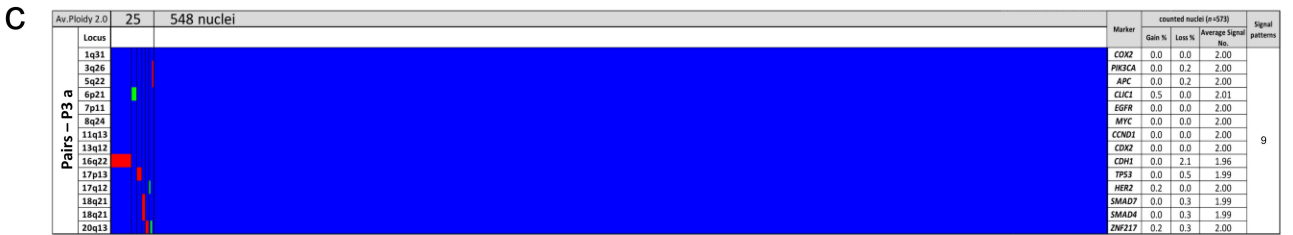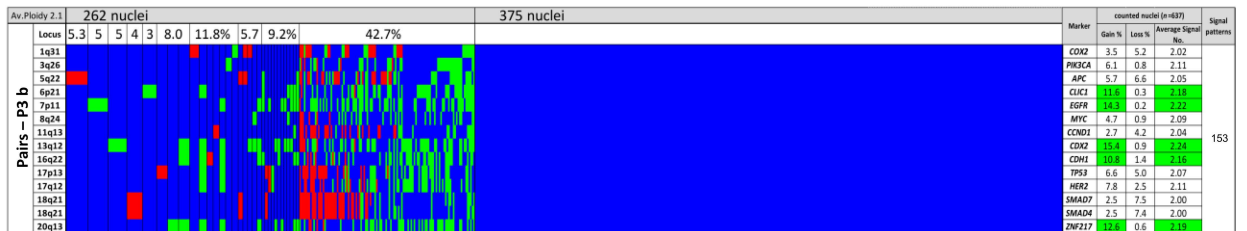



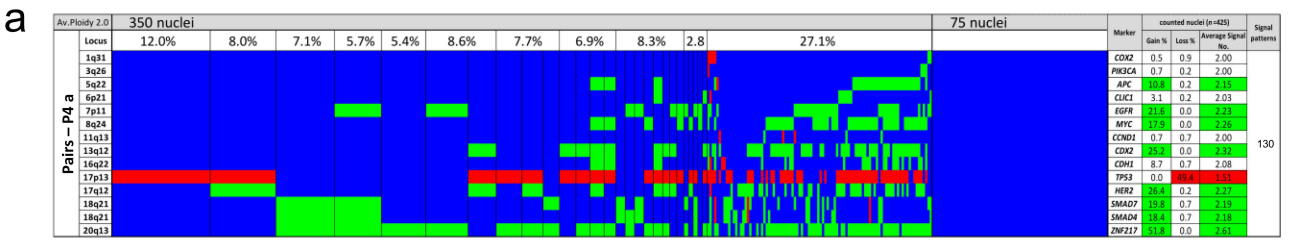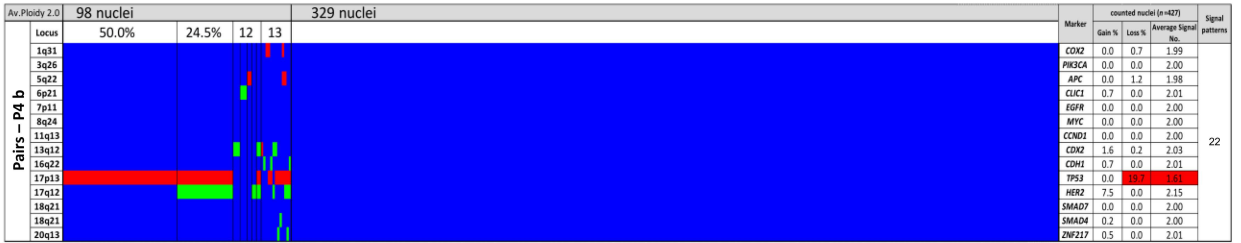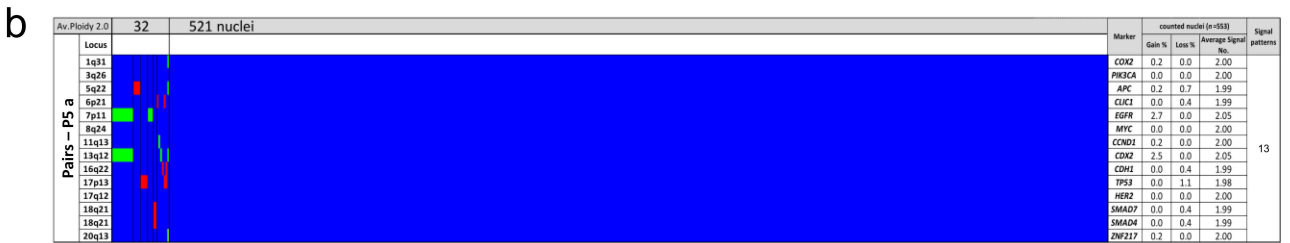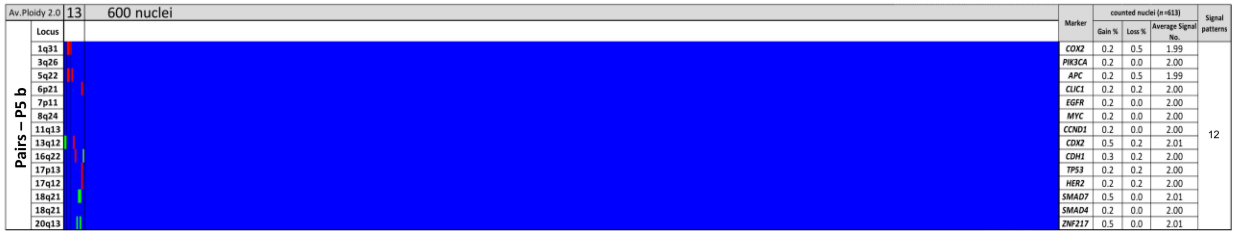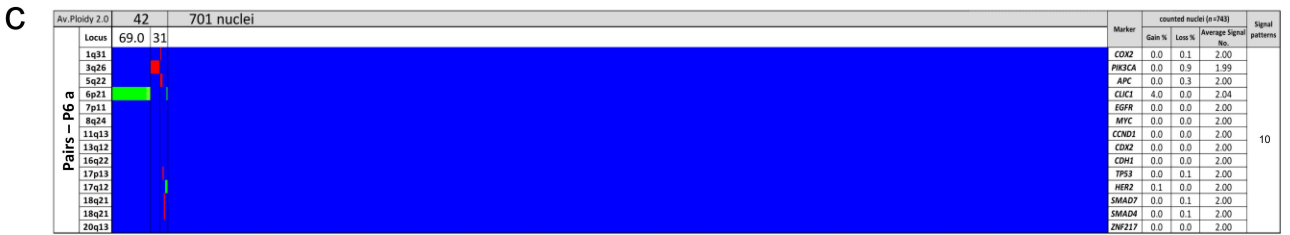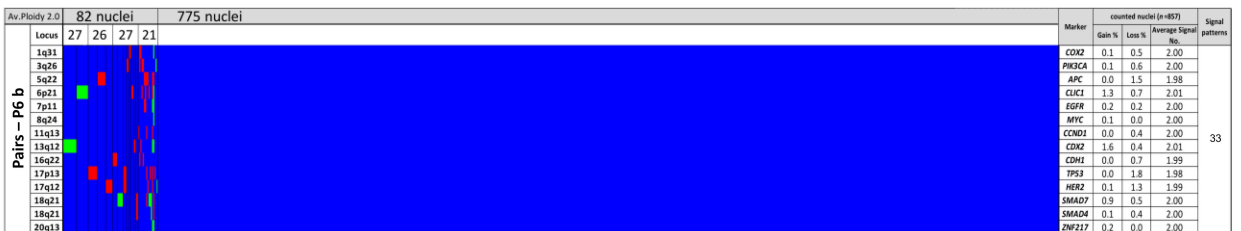

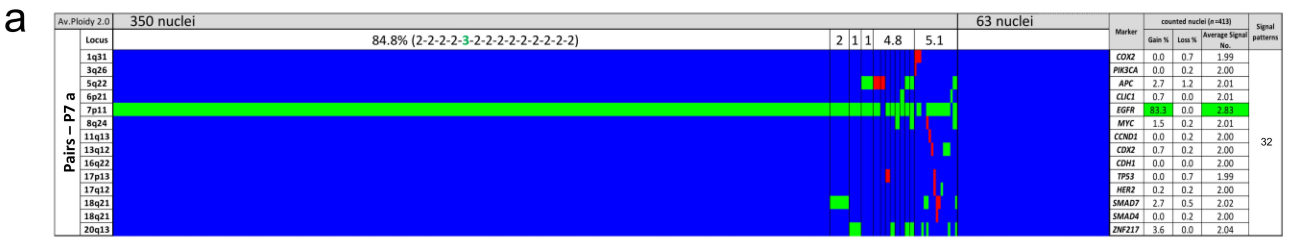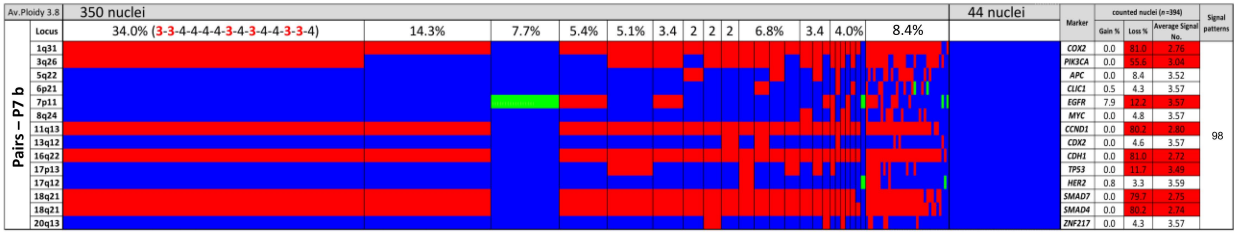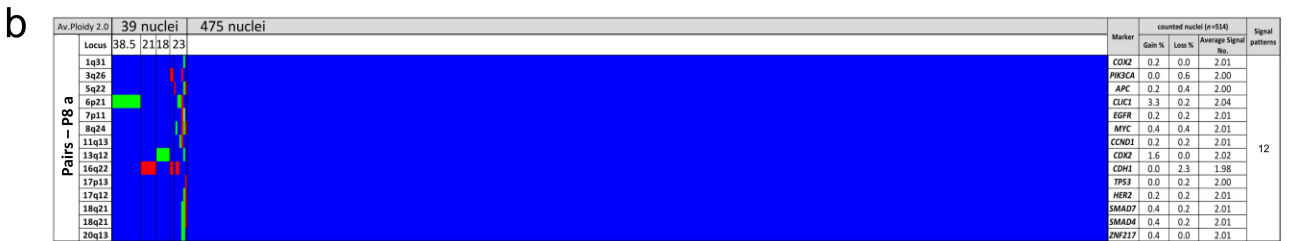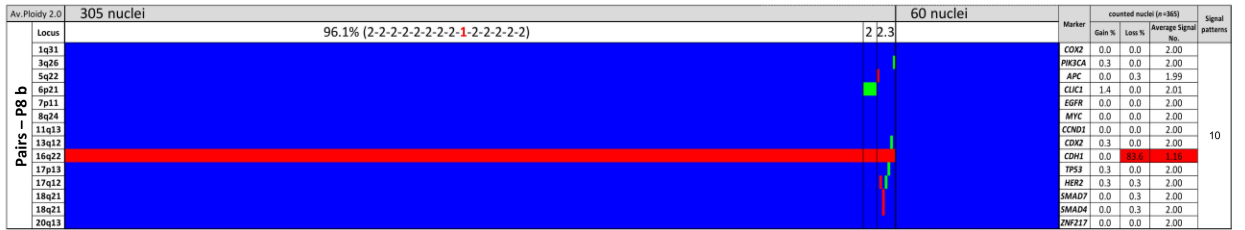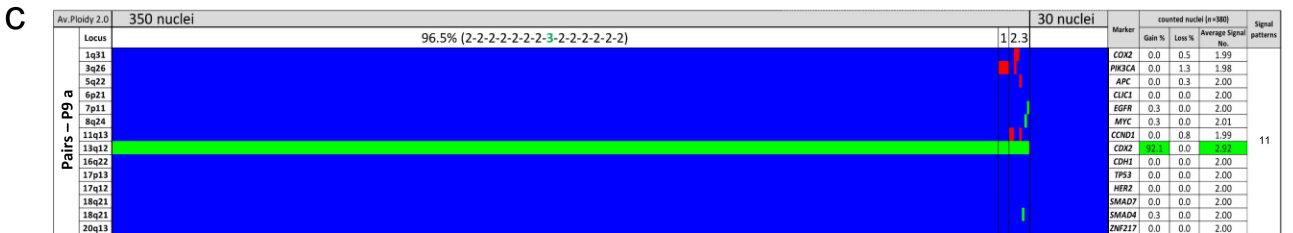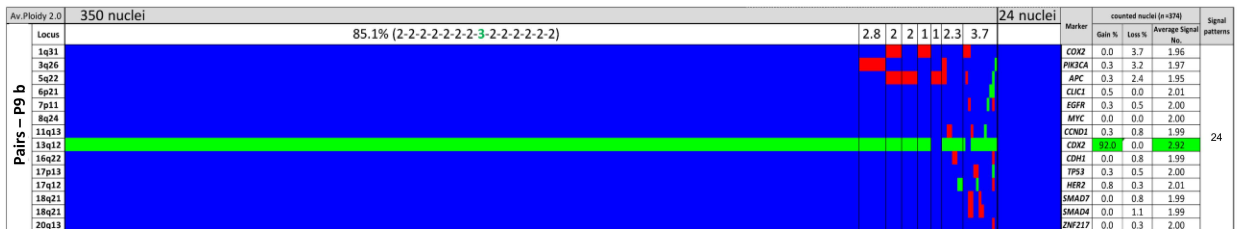

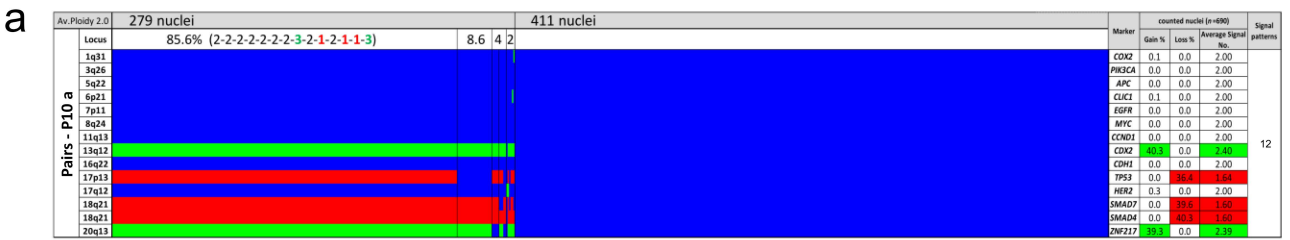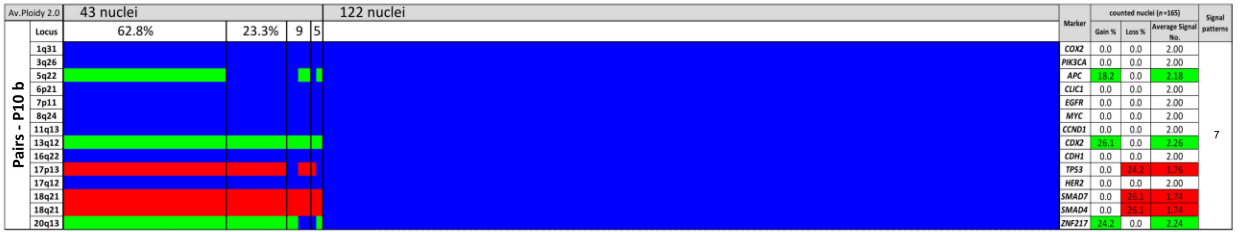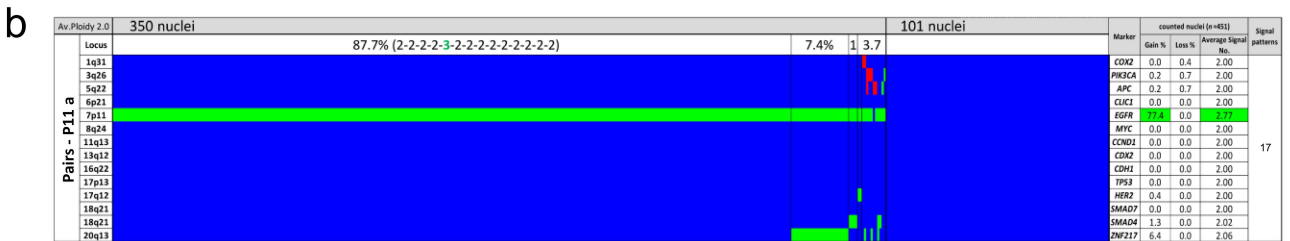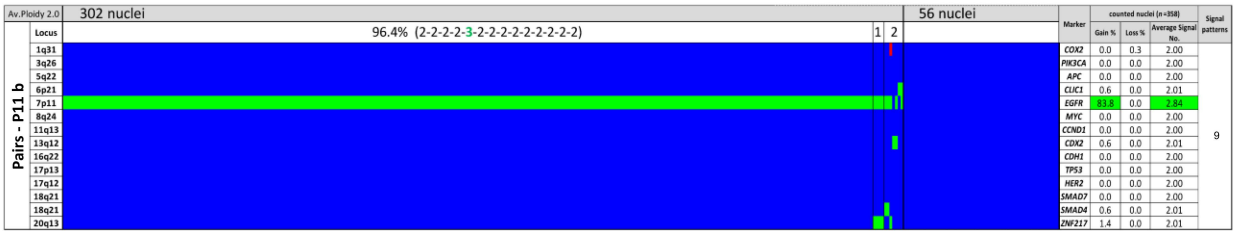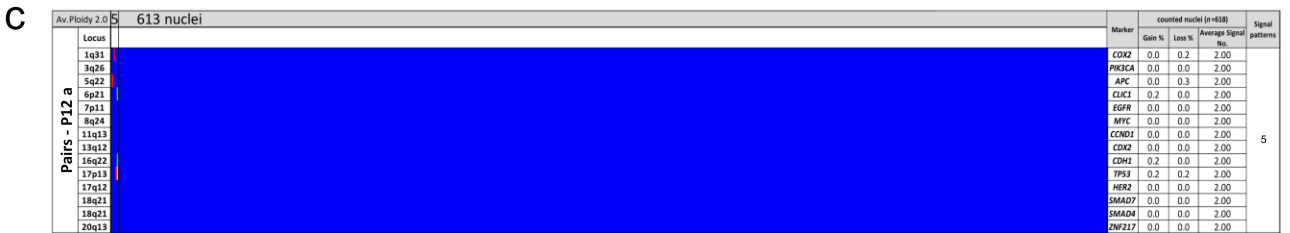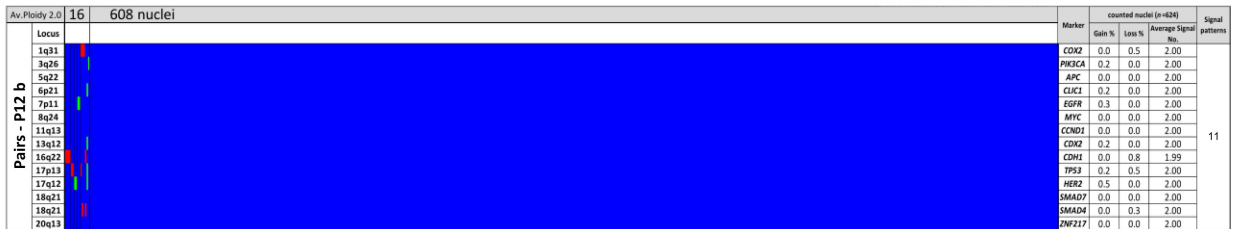

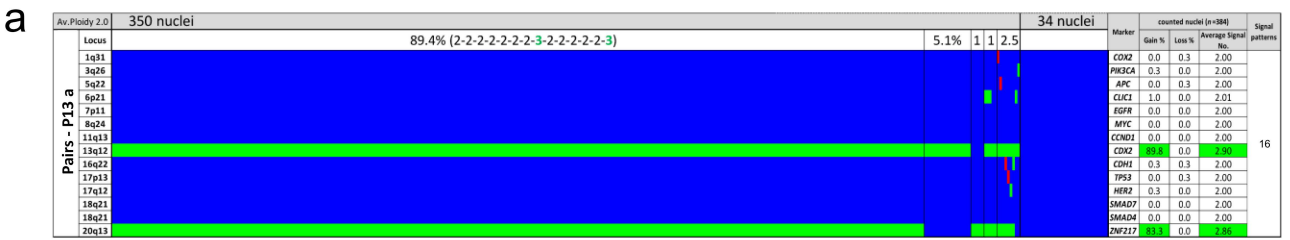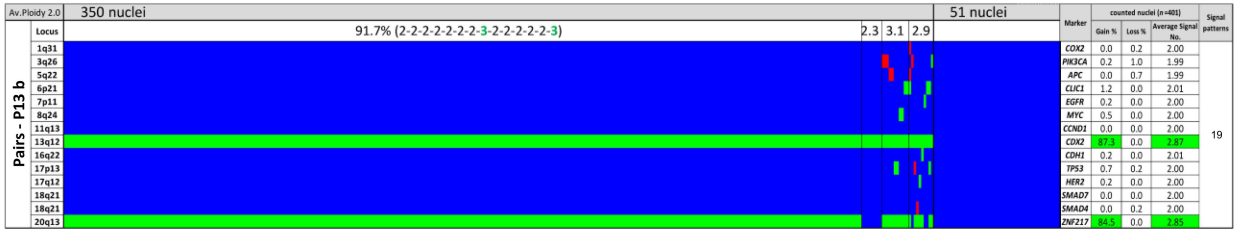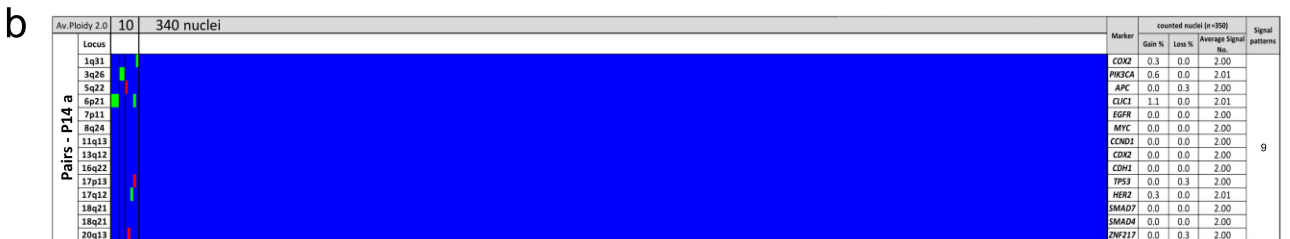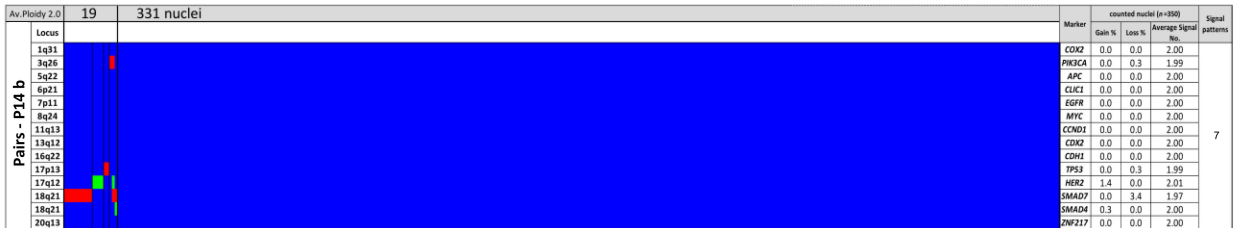

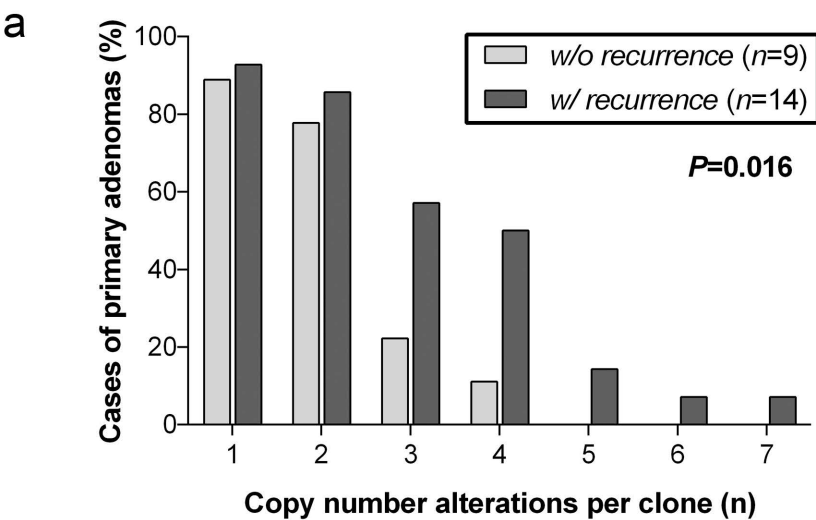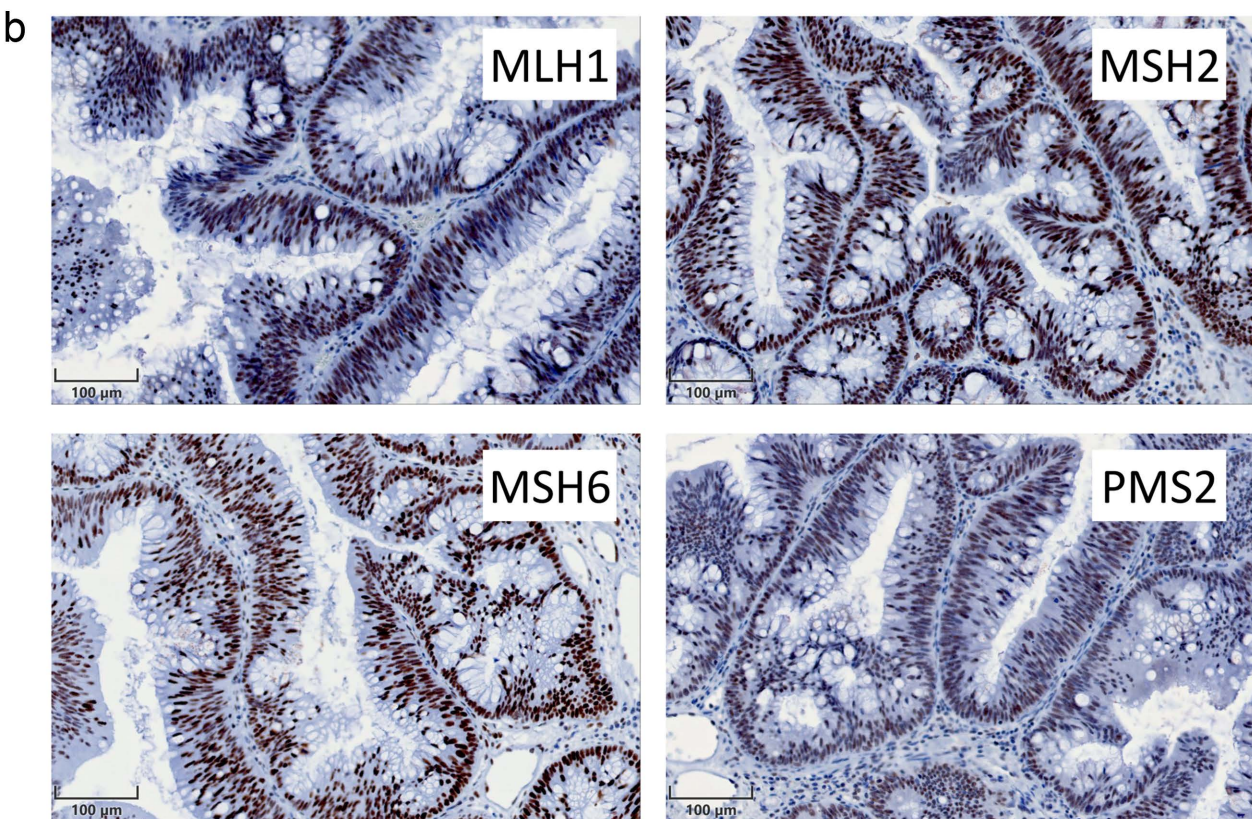

**c**

|                        |      | Adenoma sample            |     |     |     |      |      |      |      |      |      |      |      |      |      |      |      |      |      |      |      |       |       |       |       |
|------------------------|------|---------------------------|-----|-----|-----|------|------|------|------|------|------|------|------|------|------|------|------|------|------|------|------|-------|-------|-------|-------|
|                        |      | A 2                       | A 4 | A 5 | A 7 | A 12 | A 17 | A 20 | A 21 | A 24 | A 25 | A 26 | A 29 | P 2a | P 2b | P 3a | P 5a | P 5b | P 6a | P 6b | P 8a | P 12a | P 12b | P 14a | P 14b |
| MMR protein expression | MLH1 | +                         | +   | +   | +   | +    | +    | +    | +    | +    | +    | +    | +    | +    | +    | +    | +    | +    | +    | +    | +    | +     | +     | +     | +     |
|                        | MSH2 | +                         | +   | +   | +   | +    | +    | +    | +    | +    | +    | +    | +    | +    | +    | +    | +    | +    | +    | +    | +    | +     | +     | +     | +     |
|                        | MSH6 | +                         | +   | +   | +   | +    | +    | +    | +    | +    | +    | +    | +    | +    | +    | +    | +    | +    | +    | +    | +    | +     | +     | +     | +     |
|                        | PMS2 | +                         | +   | +   | +   | +    | +    | +    | +    | +    | +    | +    | +    | +    | +    | +    | +    | +    | +    | +    | +    | +     | +     | +     | +     |
|                        |      | MSS                       | MSS | MSS | MSS | MSS  | MSS  | MSS  | MSS  | MSS  | MSS  | MSS  | MSS  | MSS  | MSS  | MSS  | MSS  | MSS  | MSS  | MSS  | MSS  | MSS   | MSS   | MSS   | MSS   |
|                        |      | DNA microsatellite status |     |     |     |      |      |      |      |      |      |      |      |      |      |      |      |      |      |      |      |       |       |       |       |

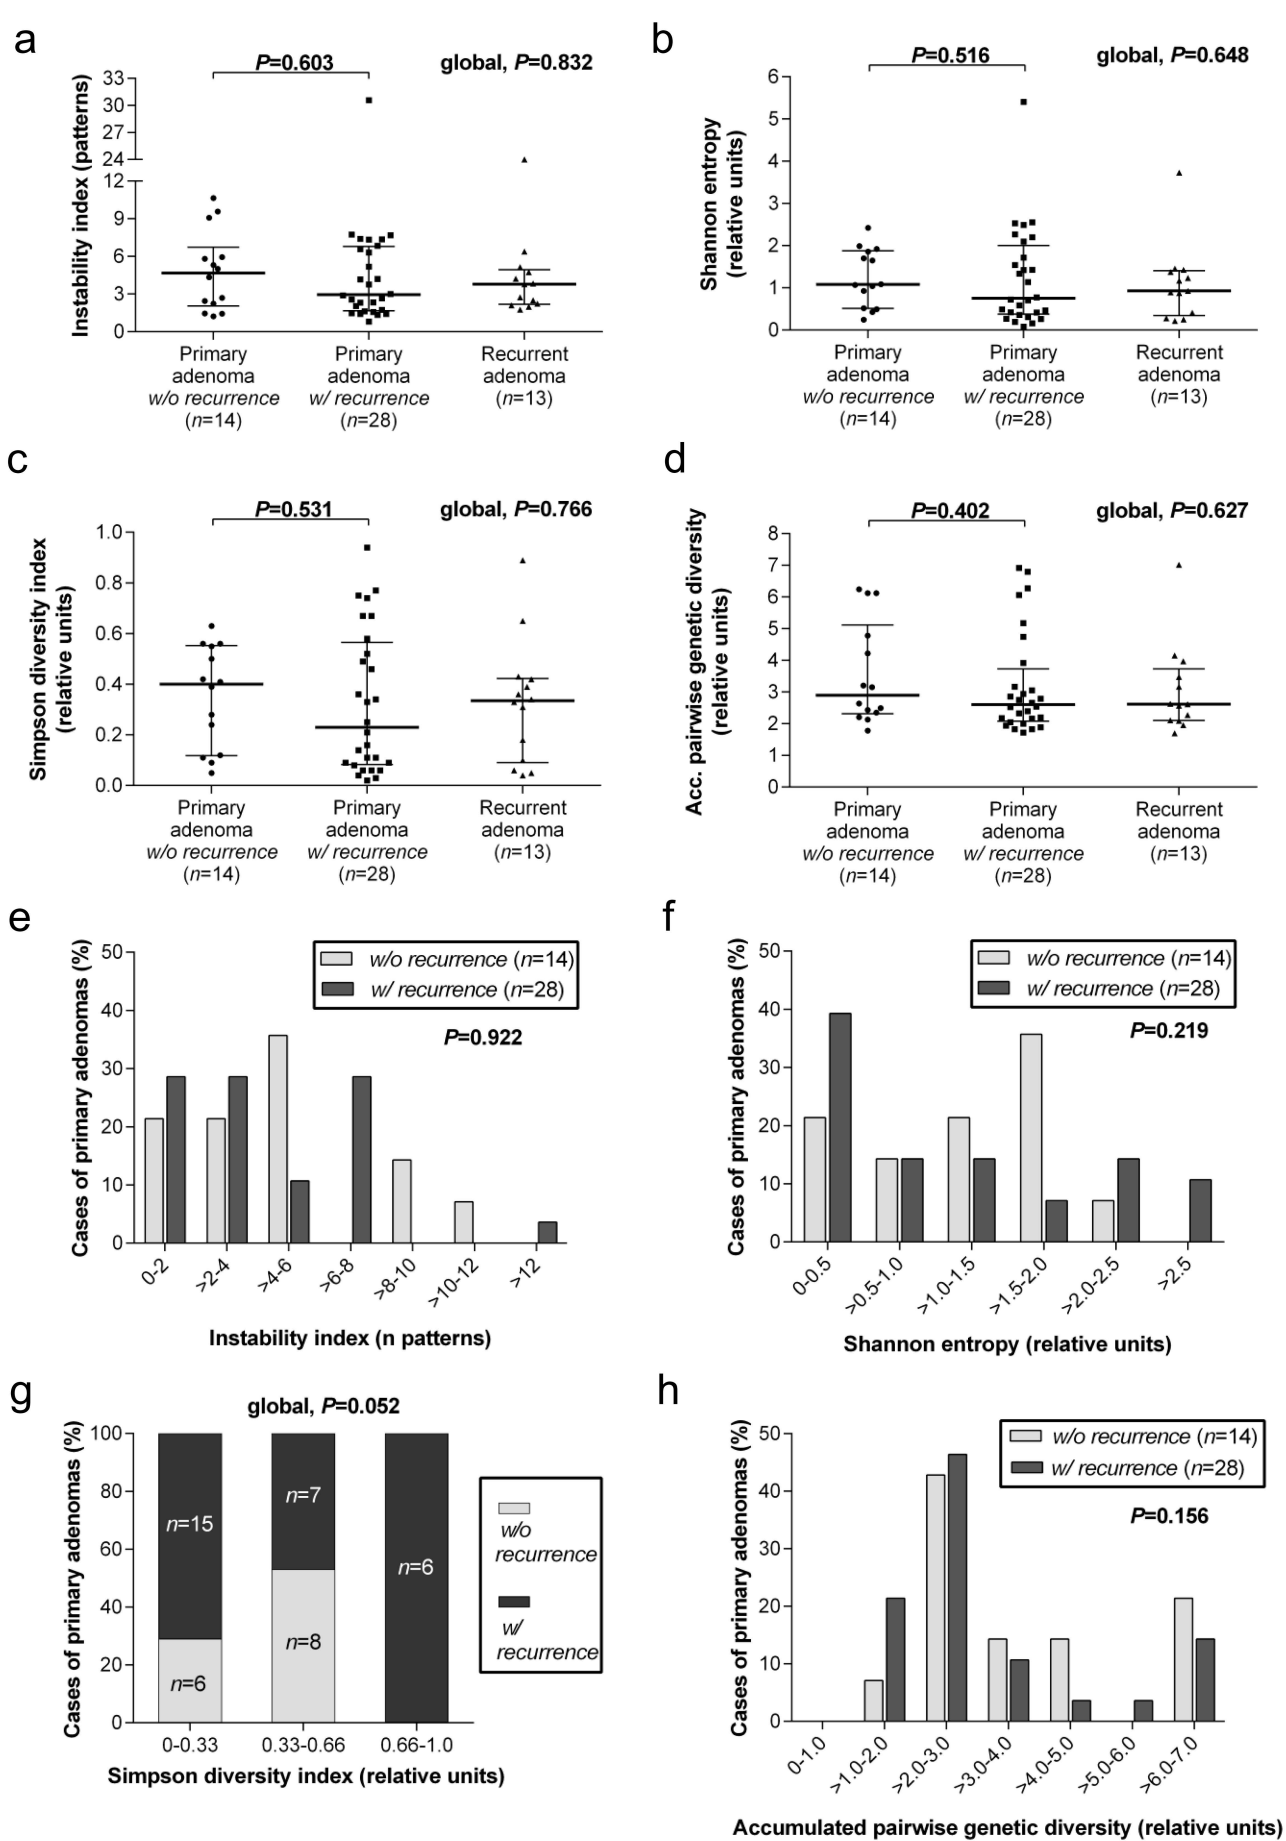

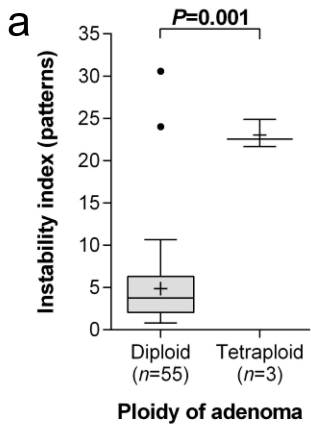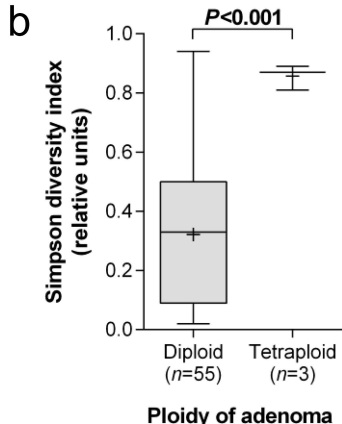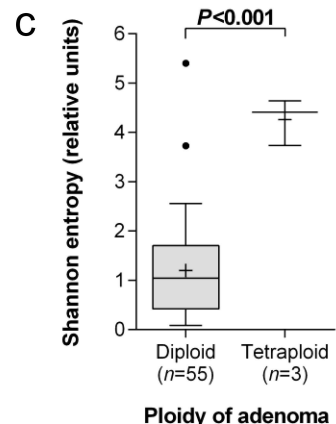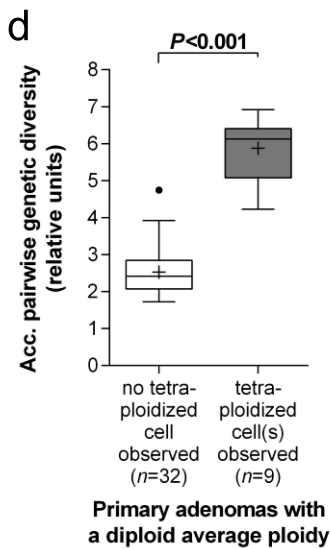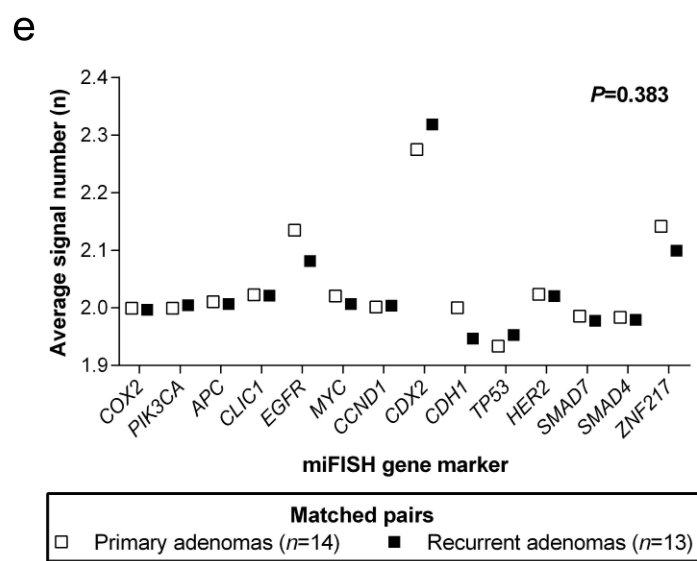

Supporting Information Figure 15

## a Simplification pattern (pair P8)

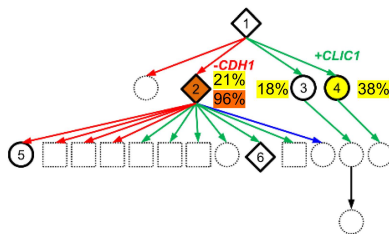

| Nodes (clone fractions) |                                        | Major clones                                                                                                                  | Signal patterns                                                                                                                                                           |
|-------------------------|----------------------------------------|-------------------------------------------------------------------------------------------------------------------------------|---------------------------------------------------------------------------------------------------------------------------------------------------------------------------|
| ○                       | ○ Primary adenoma                      | <b>Primary adenoma</b>                                                                                                        | Signal counts of gene probes are sorted in the following order:<br><i>COX2, PIK3CA, APC, CLIC1, EGFR, MYC, CEP10, CCND1, CDX2, CDH1, TP53, HER2, SMAD7, SMAD4, ZNF217</i> |
| □                       | □ Recurrent adenoma                    | <b>Recurrent adenoma</b>                                                                                                      |                                                                                                                                                                           |
| ◇                       | ◇ Shared by both<br>$n \geq 2$ $n = 1$ | Percentages annotated to the clones display the frequency of observation within the aberrant clone population (threshold 5%). |                                                                                                                                                                           |
| Edges (genomic event)   |                                        |                                                                                                                               | <i>Brackets: number of cells in (●) primary and (■) recurrent adenoma</i>                                                                                                 |
| →                       | → Copy number gain                     | → Whole genome duplication (WGD)                                                                                              | 1: 2,2,2,2,2,2,2,2,2,2,2,2,2,2,2,2 (● 475, ■ 60)                                                                                                                          |
| →                       | → Copy number loss                     | → Multiple copy number alterations                                                                                            | 2: 2,2,2,2,2,2,2,2,2,2,1,2,2,2,2,2 (● 8, ■ 293)                                                                                                                           |
|                         |                                        |                                                                                                                               | 3: 2,2,2,2,2,2,2,2,2,3,2,2,2,2,2,2 (● 7, ■ 0)                                                                                                                             |
|                         |                                        |                                                                                                                               | 4: 2,2,2,3,2,2,2,2,2,2,2,2,2,2,2 (● 15, ■ 0)                                                                                                                              |
|                         |                                        |                                                                                                                               | 5: 2,1,2,2,2,2,2,2,2,1,2,2,2,2,2 (● 2, ■ 0)                                                                                                                               |
|                         |                                        |                                                                                                                               | 6: 2,2,2,3,2,2,2,2,2,1,2,2,2,2,2 (● 1, ■ 5)                                                                                                                               |

## b Complexity pattern (pair P6)

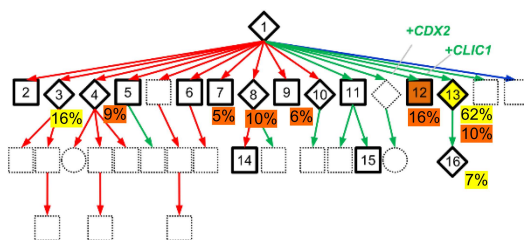

| Nodes (clone fractions) |                                        | Major clones                                                                                                                  | Signal patterns                                                                                                                                                           |
|-------------------------|----------------------------------------|-------------------------------------------------------------------------------------------------------------------------------|---------------------------------------------------------------------------------------------------------------------------------------------------------------------------|
| ○                       | ○ Primary adenoma                      | <b>Primary adenoma</b>                                                                                                        | Signal counts of gene probes are sorted in the following order:<br><i>COX2, PIK3CA, APC, CLIC1, EGFR, MYC, CEP10, CCND1, CDX2, CDH1, TP53, HER2, SMAD7, SMAD4, ZNF217</i> |
| □                       | □ Recurrent adenoma                    | <b>Recurrent adenoma</b>                                                                                                      |                                                                                                                                                                           |
| ◇                       | ◇ Shared by both<br>$n \geq 2$ $n = 1$ | Percentages annotated to the clones display the frequency of observation within the aberrant clone population (threshold 5%). |                                                                                                                                                                           |
| Edges (genomic event)   |                                        |                                                                                                                               | <i>Brackets: number of cells in (●) primary and (■) recurrent adenoma</i>                                                                                                 |
| →                       | → Copy number gain                     | → Whole genome duplication (WGD)                                                                                              | 1: 2,2,2,2,2,2,2,2,2,2,2,2,2,2,2,2 (● 701, ■ 775)                                                                                                                         |
| →                       | → Copy number loss                     | → Multiple copy number alterations                                                                                            | 2: 1,2,2,2,2,2,2,2,2,2,2,2,2,2,2,2 (● 0, ■ 2)                                                                                                                             |
|                         |                                        |                                                                                                                               | 3: 2,1,2,2,2,2,2,2,2,2,2,2,2,2,2,2 (● 7, ■ 2)                                                                                                                             |
|                         |                                        |                                                                                                                               | 4: 2,2,1,2,2,2,2,2,2,2,2,2,2,2,2,2 (● 1, ■ 7)                                                                                                                             |
|                         |                                        |                                                                                                                               | 5: 2,2,2,1,2,2,2,2,2,2,2,2,2,2,2,2 (● 0, ■ 2)                                                                                                                             |
|                         |                                        |                                                                                                                               | 6: 2,2,2,2,2,2,2,2,2,1,2,2,2,2,2,2 (● 0, ■ 2)                                                                                                                             |
|                         |                                        |                                                                                                                               | 7: 2,2,2,2,2,2,2,2,2,1,2,2,2,2,2,2 (● 0, ■ 4)                                                                                                                             |
|                         |                                        |                                                                                                                               | 8: 2,2,2,2,2,2,2,2,2,2,1,2,2,2,2,2 (● 1, ■ 8)                                                                                                                             |
|                         |                                        |                                                                                                                               | 9: 2,2,2,2,2,2,2,2,2,2,2,2,2,1,2,2,2 (● 0, ■ 5)                                                                                                                           |
|                         |                                        |                                                                                                                               | 10: 2,2,2,2,2,2,2,2,2,2,2,2,2,1,1,2 (● 1, ■ 2)                                                                                                                            |
|                         |                                        |                                                                                                                               | 11: 2,2,2,2,2,2,2,2,2,2,2,2,2,3,2,2 (● 0, ■ 2)                                                                                                                            |
|                         |                                        |                                                                                                                               | 12: 2,2,2,2,2,2,2,2,2,3,2,2,2,2,2,2 (● 0, ■ 13)                                                                                                                           |
|                         |                                        |                                                                                                                               | 13: 2,2,2,3,2,2,2,2,2,2,2,2,2,2,2,2 (● 26, ■ 8)                                                                                                                           |
|                         |                                        |                                                                                                                               | 14: 2,2,2,2,2,2,2,2,2,2,2,1,1,2,2,2 (● 0, ■ 3)                                                                                                                            |
|                         |                                        |                                                                                                                               | 15: 2,2,2,2,2,2,2,2,2,2,2,4,2,2,2 (● 0, ■ 3)                                                                                                                              |
|                         |                                        |                                                                                                                               | 16: 2,2,2,4,2,2,2,2,2,2,2,2,2,2,2,2 (● 3, ■ 2)                                                                                                                            |



# Complexity pattern (pair P3)

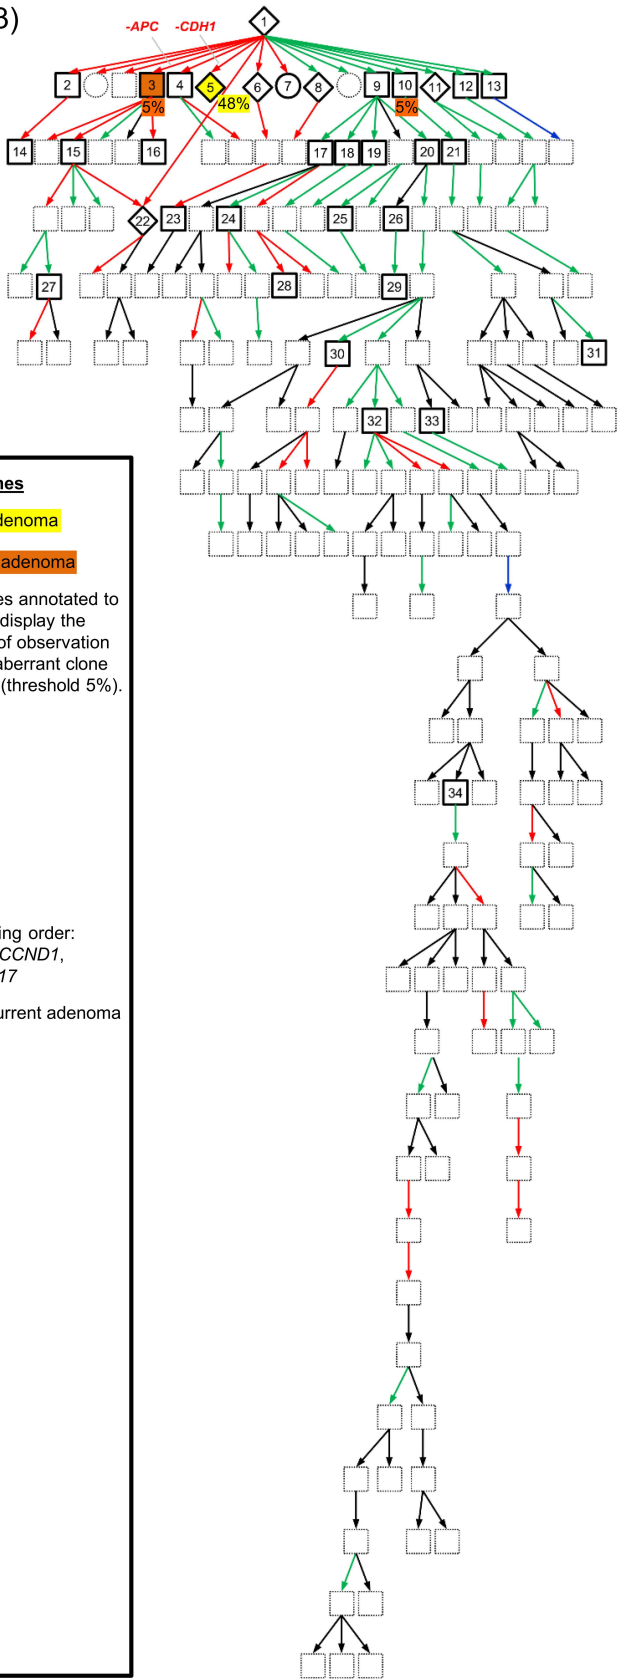

## Nodes (clone fractions)

- Primary adenoma
- Recurrent adenoma
- ◇ Shared by both
- $n \geq 2$
- $n = 1$

## Major clones

- Primary adenoma
- Recurrent adenoma

Percentages annotated to the clones display the frequency of observation within the aberrant clone population (threshold 5%).

## Edges (genomic event)

- Copy number gain
- Copy number loss
- Whole genome duplication (WGD)
- Multiple copy number alterations

## Signal patterns

Signal counts of gene probes are sorted in the following order:  
*COX2, PIK3CA, APC, CLIC1, EGFR, MYC, CEP10, CCND1, CDX2, CDH1, TP53, HER2, SMAD7, SMAD4, ZNF217*

Brackets: number of cells in (●) primary and (■) recurrent adenoma

- 1: 2,2,2,2,2,2,2,2,2,2,2,2,2,2,2,2 (● 548, ■ 375)
- 2: 1,2,2,2,2,2,2,2,2,2,2,2,2,2,2,2 (● 0, ■ 4)
- 3: 2,2,1,2,2,2,2,2,2,2,2,2,2,2,2,2 (● 0, ■ 14)
- 4: 2,2,2,2,2,2,2,1,2,2,2,2,2,2,2,2 (● 0, ■ 4)
- 5: 2,2,2,2,2,2,2,2,2,1,2,2,2,2,2,2 (● 12, ■ 4)
- 6: 2,2,2,2,2,2,2,2,2,2,1,2,2,2,2,2 (● 3, ■ 7)
- 7: 2,2,2,2,2,2,2,2,2,2,2,2,2,2,1 (● 2, ■ 0)
- 8: 2,2,2,2,2,2,2,2,2,2,2,2,2,2,3 (● 1, ■ 7)
- 9: 2,2,2,2,2,2,2,3,2,2,2,2,2,2,2 (● 0, ■ 9)
- 10: 2,2,2,2,3,2,2,2,2,2,2,2,2,2,2 (● 0, ■ 13)
- 11: 2,2,2,3,2,2,2,2,2,2,2,2,2,2,2 (● 3, ■ 9)
- 12: 2,3,2,2,2,2,2,2,2,2,2,2,2,2,2 (● 0, ■ 4)
- 13: 3,2,2,2,2,2,2,2,2,2,2,2,2,2,2 (● 0, ■ 4)
- 14: 0,2,2,2,2,2,2,2,2,2,2,2,2,2,2 (● 0, ■ 2)
- 15: 2,2,1,2,2,2,2,2,2,2,2,2,2,1,1,2 (● 0, ■ 3)
- 16: 1,2,1,2,2,2,2,2,2,2,2,2,2,2,2 (● 0, ■ 3)
- 17: 2,2,2,2,2,2,2,2,4,2,2,2,2,2,2 (● 0, ■ 3)
- 18: 2,2,2,2,3,2,2,3,2,2,2,2,2,2,2 (● 0, ■ 2)
- 19: 2,2,2,2,3,2,2,3,2,2,2,2,2,2,2 (● 0, ■ 2)
- 20: 2,2,2,2,2,2,2,2,3,3,2,2,2,2,2 (● 0, ■ 2)
- 21: 2,2,2,2,3,2,2,2,2,2,2,2,2,3 (● 0, ■ 2)
- 22: 2,2,2,2,2,2,2,2,2,2,2,2,1,1,2 (● 2, ■ 10)
- 23: 2,2,2,2,3,2,2,2,2,2,1,1,2,2,2 (● 0, ■ 2)
- 24: 2,2,2,2,2,2,2,2,4,2,2,2,2,3 (● 0, ■ 2)
- 25: 2,2,2,3,3,2,2,3,2,2,2,2,2,2 (● 0, ■ 2)
- 26: 2,2,2,2,2,2,2,2,3,3,2,2,2,3 (● 0, ■ 7)
- 27: 2,2,2,2,2,2,2,2,2,2,1,2,1,1,2 (● 0, ■ 2)
- 28: 0,2,2,2,2,2,2,4,2,2,2,2,2,2 (● 0, ■ 4)
- 29: 2,2,2,2,3,2,2,3,3,2,2,2,3 (● 0, ■ 3)
- 30: 2,2,2,2,3,2,2,3,3,3,3,2,3 (● 0, ■ 3)
- 31: 2,2,2,3,3,2,2,3,2,3,2,2,3 (● 0, ■ 2)
- 32: 2,2,2,3,2,2,2,3,3,3,3,2,3 (● 0, ■ 5)
- 33: 2,2,2,2,2,2,2,2,2,3,3,2,2,2 (● 0, ■ 2)
- 34: 3,3,4,4,4,3,2,3,3,4,3,3,3,3 (● 0, ■ 2)

**Stabilisation pattern (pair P9)**

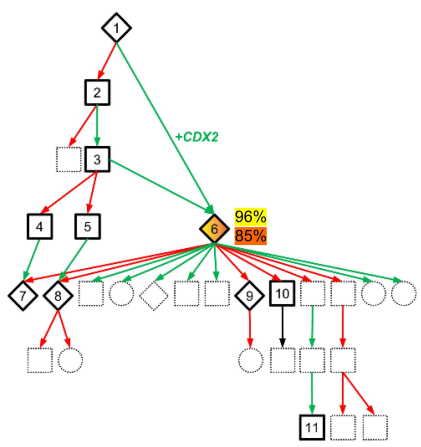

**Stabilisation (-progression) pattern (pair P10)**

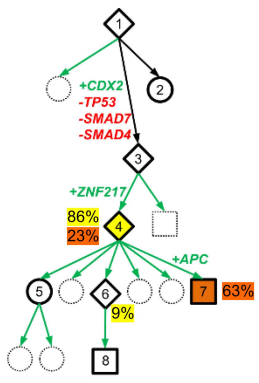

**Stabilisation pattern (pair P11)**

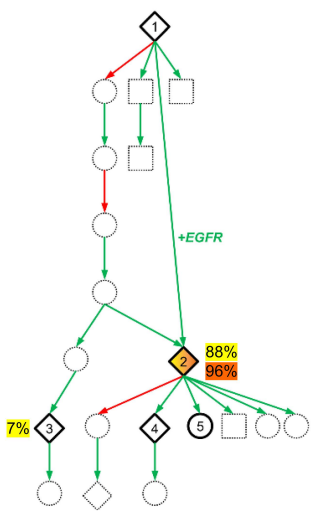

**Stabilisation pattern (pair P13)**

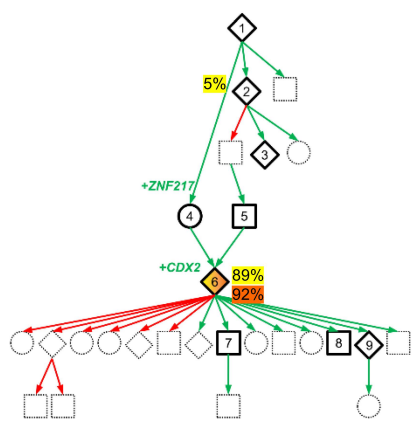

**Nodes (clone fractions)**

- Primary adenoma
- Recurrent adenoma
- ◇ Shared by both
- n≥2 n=1

**Edges (genomic event)**

- Copy number gain
- Copy number loss
- Whole genome duplication (WGD)
- Multiple copy number alterations

**Major clones**

- Primary adenoma
- Recurrent adenoma
- Shared by both

Percentages annotated to the clones display the frequency of observation within the aberrant clone population (threshold 5%).

**Signal patterns**

Signal counts of gene probes are sorted in the following order: COX2, PIK3CA, APC, CLIC1, EGFR, MYC, CEP10, CCND1, CDX2, CDH1, TP53, HER2, SMAD7, SMAD4, ZNF217

Brackets: number of cells in (●) primary and (■) recurrent adenoma

**(pair P9)**

- 1: 2,2,2,2,2,2,2,2,2,2,2,2,2,2,2,2 (● 30, ■ 24)
- 2: 2,2,1,2,2,2,2,2,2,2,2,2,2,2,2,2 (● 0, ■ 4)
- 3: 2,2,1,2,2,2,2,2,3,2,2,2,2,2,2,2 (● 0, ■ 6)
- 4: 2,1,1,2,2,2,2,2,3,2,2,2,2,2,2,2 (● 0, ■ 2)
- 5: 1,2,1,2,2,2,2,2,3,2,2,2,2,2,2,2 (● 0, ■ 6)
- 6: 2,2,2,2,2,2,2,2,3,2,2,2,2,2,2,2 (● 337, ■ 298)
- 7: 2,1,2,2,2,2,2,2,3,2,2,2,2,2,2,2 (● 4, ■ 10)
- 8: 1,2,2,2,2,2,2,2,3,2,2,2,2,2,2,2 (● 1, ■ 5)
- 9: 2,2,2,2,2,2,2,1,3,2,2,2,2,2,2,2 (● 2, ■ 2)
- 10: 2,2,2,2,2,2,2,2,3,1,2,2,2,2,2,2 (● 0, ■ 2)
- 11: 2,2,2,2,2,2,2,2,3,2,2,3,2,2,2,2 (● 0, ■ 2)

**(pair P10)**

- 1: 2,2,2,2,2,2,2,2,2,2,2,2,2,2,2,2 (● 411, ■ 122)
- 2: 2,2,2,2,2,2,2,2,3,2,2,2,2,2,2,2 (● 2, ■ 0)
- 3: 2,2,2,2,2,2,2,2,3,2,1,2,1,1,2 (● 5, ■ 1)
- 4: 2,2,2,2,2,2,2,2,3,2,1,2,1,1,3 (● 239, ■ 10)
- 5: 2,2,2,2,2,2,2,2,3,2,1,2,2,1,3 (● 2, ■ 0)
- 6: 2,2,2,2,2,2,2,2,3,2,2,2,2,1,1,3 (● 24, ■ 2)
- 7: 2,2,3,2,2,2,2,2,3,2,1,2,1,1,3 (● 0, ■ 27)
- 8: 2,2,3,2,2,2,2,2,3,2,2,2,1,1,3 (● 0, ■ 2)

**(pair P11)**

- 1: 2,2,2,2,2,2,2,2,2,2,2,2,2,2,2,2 (● 101, ■ 56)
- 2: 2,2,2,2,3,2,2,2,2,2,2,2,2,3 (● 307, ■ 291)
- 3: 2,2,2,2,3,2,2,2,2,2,2,2,2,3 (● 26, ■ 4)
- 4: 2,2,2,2,3,2,2,2,2,2,2,2,2,3,2 (● 4, ■ 1)
- 5: 2,2,2,2,3,2,2,2,2,2,2,2,3,2,2 (● 2, ■ 0)

**(pair P13)**

- 1: 2,2,2,2,2,2,2,2,2,2,2,2,2,2,2,2 (● 34, ■ 51)
- 2: 2,2,2,2,2,2,2,2,3,2,2,2,2,2,2,2 (● 18, ■ 8)
- 3: 2,2,2,3,2,2,2,2,3,2,2,2,2,2,2,2 (● 2, ■ 1)
- 4: 2,2,2,2,2,2,2,2,2,2,2,2,2,3 (● 0, ■ 5)
- 5: 2,1,2,2,2,2,2,2,3,2,2,2,2,2,3 (● 0, ■ 2)
- 6: 2,2,2,2,2,2,2,2,3,2,2,2,2,2,3 (● 313, ■ 321)
- 7: 2,2,2,2,2,2,2,2,3,2,3,2,2,2,3 (● 0, ■ 2)
- 8: 2,2,2,2,3,2,2,3,2,2,2,2,2,3 (● 0, ■ 2)
- 9: 2,2,2,3,2,2,2,2,3,2,2,2,2,2,3 (● 3, ■ 2)



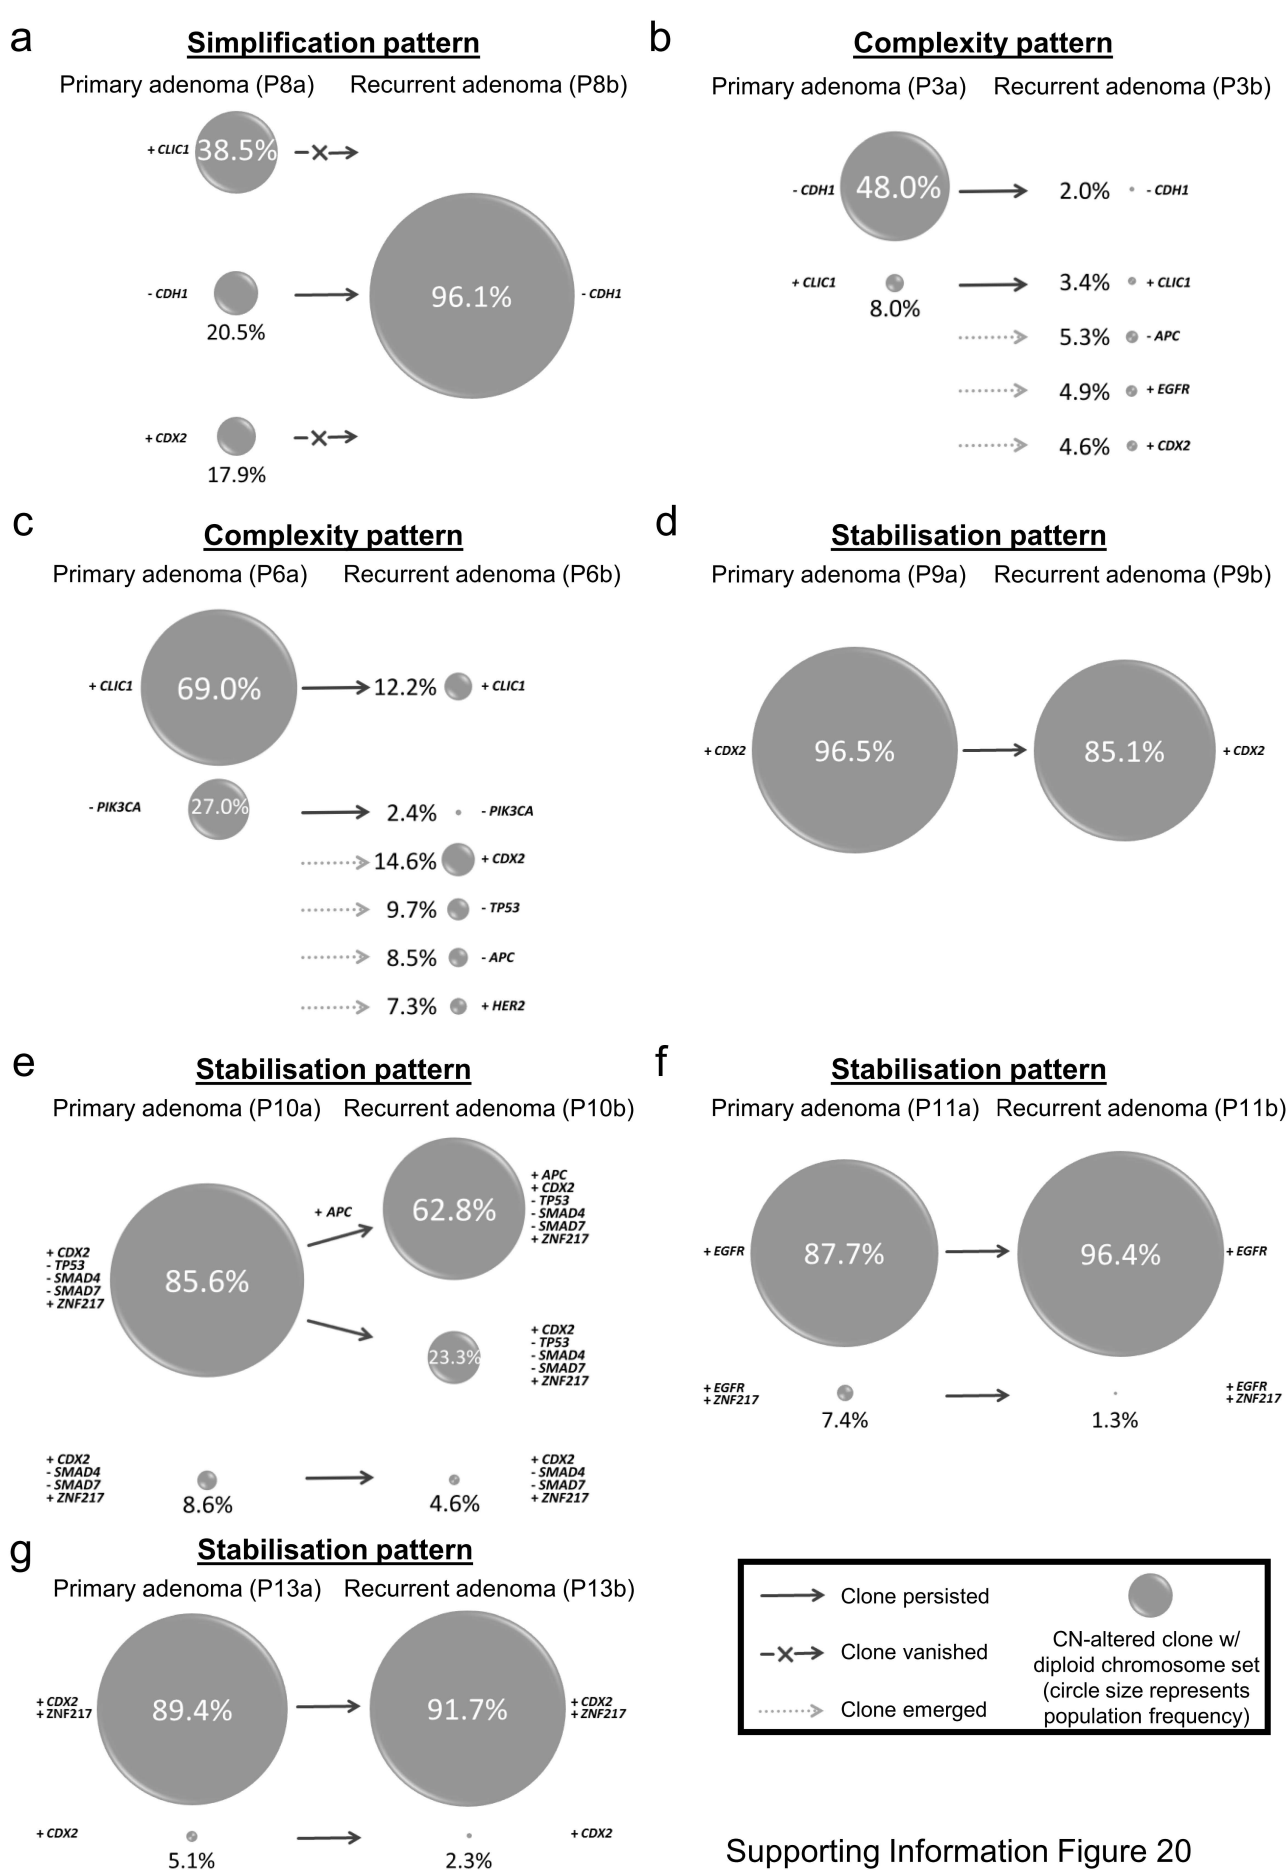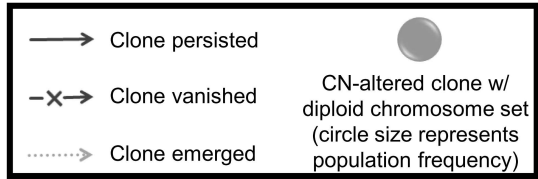

**a** **“Zero” pattern**

Primary adenoma (P5a)    Recurrent adenoma (P5b)

No characteristic clone     $\longrightarrow$     No characteristic clone

**b** **“Zero” pattern**

Primary adenoma (P12a)    Recurrent adenoma (P12b)

No characteristic clone     $\longrightarrow$     No characteristic clone

**c** **“Zero” pattern**

Primary adenoma (P14a)    Recurrent adenoma (P14b)

No characteristic clone     $\longrightarrow$     No characteristic clone
